# Supplementary material for: Subtilisin-like protease-1 secreted through type IV secretion system contributes to high virulence of Streptococcus suis 2
Source: PubMed Central journal article supplement (PMC4897608; doi:10.1038/srep27369), 2016-06-08
Supplement: srep27369-s1.pdf [file srep27369-s1.pdf]

**Subtilisin-like protease-1 secreted through type IV secretion system contributes to high virulence of *Streptococcus suis* 2**

Supeng Yin<sup>1</sup>, Ming Li<sup>1</sup>, Xiancai Rao<sup>1</sup>, Xinyue Yao<sup>1</sup>, Qiu Zhong<sup>1</sup>, Min Wang<sup>1</sup>, Jing Wang<sup>1</sup>, Yizhi Peng<sup>2</sup>, Jiaqi Tang<sup>3</sup>, Fuquan Hu<sup>1\*</sup>, Yan Zhao<sup>1\*</sup>

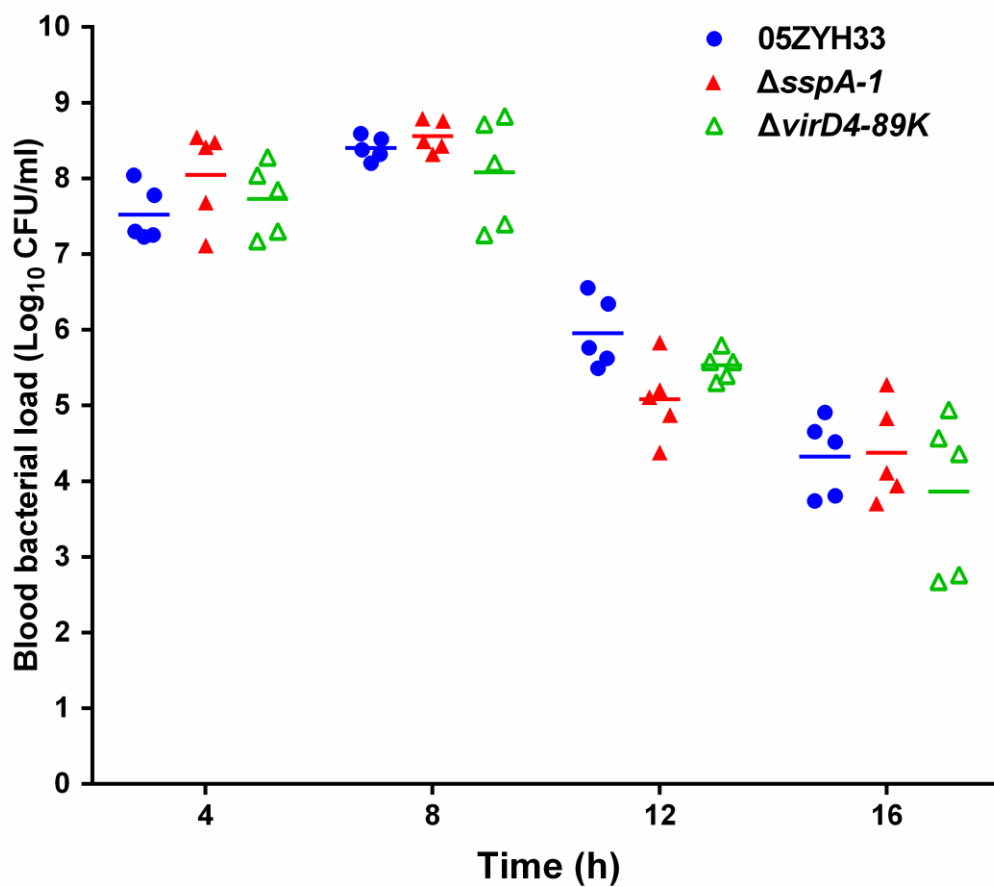

**Figure S1. Blood bacterial loads of infected mice.**

The blood bacterial loads in the BALB/c mice infected with the designated strains at 4, 8, 12, and 16 h after infection.  $P > 0.05$  for the comparison among the wild-type strain 05ZYH33,  $\Delta$ sspA-1 mutant, and  $\Delta$ virD4-89K mutant at each of the same time point. The data are representative of three independent experiments.

**Table S1.** Bacterial strains and plasmids

| Strains/plasmids            | Characteristics/Function                                                                            | Source         |
|-----------------------------|-----------------------------------------------------------------------------------------------------|----------------|
| <b>Strains</b>              |                                                                                                     |                |
| 05ZYH33                     | A highly virulent strain isolated from a deceased patient with a streptococcal toxic shock syndrome | Lab collection |
| $\Delta$ <i>sspA-1</i>      | 05ZYH33 derivative with the <i>sspA-1</i> gene replaced by a <i>spc</i> gene cassette               | This study     |
| C $\Delta$ <i>sspA-1</i>    | Complemented strain of $\Delta$ <i>sspA-1</i> ; Spc <sup>R</sup> ; Em <sup>R</sup>                  | This study     |
| $\Delta$ <i>virD4-89K</i>   | 05ZYH33 derivative with the <i>virD4-89K</i> gene replaced by a <i>spc</i> gene cassette            | Lab collection |
| $\Delta$ <i>virB1-89K</i>   | 05ZYH33 derivative with the <i>virB1-89K</i> gene replaced by a <i>spc</i> gene cassette            | Lab collection |
| $\Delta$ <i>virB4-89K</i>   | 05ZYH33 derivative with the <i>virB4-89K</i> gene replaced by a <i>spc</i> gene cassette            | Lab collection |
| <i>E. coli</i> DH5 $\alpha$ | Cloning host for maintaining recombinant plasmids                                                   | Lab collection |
| <i>E. coli</i> BL21(DE3)    | Expression host for overproducing recombinant protein                                               | Lab collection |
| <b>Plasmids</b>             |                                                                                                     |                |
| pET-28a                     | His-tag fusion expression vector ; Kan <sup>R</sup>                                                 | Novagen        |
| pGEX-6P-1                   | GST-tag fusion expression vector; Amp <sup>R</sup>                                                  | GE Healthcare  |
| pUC18                       | Cloning vector; Amp <sup>R</sup>                                                                    | TaKaRa         |
| pVA838                      | <i>E. coli-S. suis</i> shuttle vector; Em <sup>R</sup> ; Cm <sup>R</sup>                            | Lab collection |

Spc<sup>R</sup>, spectinomycin resistant; Kan<sup>R</sup>, kanamycin resistant; Amp<sup>R</sup>, ampicillin resistant; Em<sup>R</sup>, erythromycin resistant.

**Table S2.** Primers used in this study

| Primers            | Sequence (5'-3')                                     | Function                 |
|--------------------|------------------------------------------------------|--------------------------|
| LA-F               | CCGGAATTCAGTGGTCTCAGATTGAG ( <i>EcoR</i> I)          | <i>sspA-1</i> knock out  |
| LA-R               | CGCGGATCCCGTGGGTATCATCGTAGAGA ( <i>BamH</i> I)       | <i>sspA-1</i> knock out  |
| RA-F               | AACTGCAGAAGTTTGGGAGGTTTCGAG ( <i>Pst</i> I)          | <i>sspA-1</i> knock out  |
| RA-R               | CCCAAGCTTGAATGAGCTTGTTTCG ( <i>Hind</i> III)         | <i>sspA-1</i> knock out  |
| <i>spc</i> -F      | CGCGGATCCGTTTCGTGAATACATGTTATAATA ( <i>BamH</i> I)   | <i>sspA-1</i> knock out  |
| <i>spc</i> -R      | AACTGCAGTTTCTAAAATCTGAT ( <i>Pst</i> I)              | <i>sspA-1</i> knock out  |
| In-F               | TCAATCGCCTCTCAATCCAG                                 | <i>sspA-1</i> knock out  |
| In-R               | CCTCCCAAACCTTTATTATTATCC                             | <i>sspA-1</i> knock out  |
| Out-F              | AGCCTGTGCTTTTTCTTGTT                                 | <i>sspA-1</i> knock out  |
| Out-R              | TTCACTATCCACTACCTGTCTT                               | <i>sspA-1</i> knock out  |
| <i>CsspA-1</i> -F  | CGCGGATCCGTTGGCGACACTGTTTGTATTATT ( <i>BamH</i> I)   | <i>sspA-1</i> complement |
| <i>CsspA-1</i> -MR | ACATGCATGCCAGATGAATCTAGAAC ( <i>Sph</i> I)           | <i>sspA-1</i> complement |
| <i>CsspA-1</i> -MF | ACATGCATGCTTTGGAAAATTCTCC ( <i>Sph</i> I)            | <i>sspA-1</i> complement |
| <i>CsspA-1</i> -R  | CCGGAATTCCTTACATTGGTATATGCGCTTCCGAT ( <i>EcoR</i> I) | <i>sspA-1</i> complement |
| <i>sspA</i> -in-F  | TCAATCGCCTCTCAATCCAG                                 | qRT-PCR                  |
| <i>sspA</i> -in-R  | CCTCCCAAACCTTTATTATTATCC                             | qRT-PCR                  |
| 16S-in-F           | GTTGCGAACGGGTGAGTAA                                  | qRT-PCR                  |
| 16S-in-R           | TCTCAGGTCGGCTATGTATCG                                | qRT-PCR                  |
| <i>sspA</i> -F     | GGAATTCCATATGGGAGTGGTCAAGAAGTTGT ( <i>Nde</i> I)     | His-SspA-1 expression    |
| <i>sspA</i> -R     | CCCTCGAGAGAAGTGGTTTCCCAAGCC ( <i>Xho</i> I)          | His-SspA-1 expression    |
| <i>virD4</i> -F    | CGCGGATCCACAGGACAGAAGGTCTATCG ( <i>BamH</i> I)       | GST-VirD4 expression     |
| <i>virD4</i> -R    | CCGCTCGAGTTAATGTAGTGTCGTTTCTGTGC ( <i>Xho</i> I)     | GST-VirD4 expression     |
